# Supplementary material for: Differences and similarities between kraft and oxygen delignification of softwood fibers: effects on mechanical properties
Source: Springer Nature journal article supplement (doi:10.1007/s10570-021-03781-2), 2021-02-27
Supplement: MOESM1 [file 18911840]

1 Cláudia Vicente Esteves

* Corresponding Author: claudia.esteves@ri.se

ORCID 0000-0002-0816-0047

2,3 Olena Sevastyanova

olena@kth.se

ORCID 0000-0001-7433-0350

3 Sören Östlund

soren@kth.se

ORCID 0000-0001-8699-7910

1 Elisabet Brännvall

elisabet.brannvall@ri.se

ORCID 0000-0002-8992-3623

1 RISE INNVENTIA AB, Drottning Kristinas väg 61, SE-114 28 Stockholm, Sweden

2 KTH Royal Institute of Technology, Department of Fiber and Polymer Technology, SE-100 44 Stockholm, Sweden

3 KTH Royal Institute of Technology, Wallenberg Wood Science Center, Department of Fiber and Polymer Technology, SE-100 44 Stockholm, Sweden

4 KTH Royal Institute of Technology, Department of Engineering Mechanics, Solid Mechanics, SE-100 44 Stockholm, Sweden

*Differences and similarities between kraft and oxygen delignification of softwood fibers – effects on mechanical properties*

Supplementary Information:

**Table S1** Summary of Kraft cooks; temperature 160 °C, sulfidity 30 % and liquor-to-wood ratio 4.5 l/kg. Kx = kraft cooked pulps to kappa number x

| **Samples** | **Kappa number** | **Total Yield (%)** | **Effective Alkali (%)** | **RestAlkali (g/l)** | **Total Fiber charge (µekv/g)** | **Surface Fiber charge (µekv/g)** |
| --- | --- | --- | --- | --- | --- | --- |
| **K57** | 56.5 | 50.7 | 21 | 9.0 | 127.6 | 4.9 |
| **K50** | 49.5 | 49.4 | 21 | 8.5 | 124.0 | 4.31 |
| **K46** | 45.7 | 50.4 | 22 | 10.4 | 107.8 | 4.25 |
| **K26** | 26.2 | 47.2 | 22 | 8.7 | 73.6 | 2.48 |

**Table S2** Summary of the oxygen delignification trials; pressure 0.7 MPa and temperature 100 °C. Kx_Oy = kraft cooked pulps to kappa number x and oxygen delignification to kappa number y

| **Oxygen pulps** | **Initial Kappa** | **NaOH (%)** | **Final Kappa** | **Time (min)** | **Final pH** | **Total Fiber charge (µekv/g)** | **Surface Fiber charge (µekv/g)** |
| --- | --- | --- | --- | --- | --- | --- | --- |
| **K57_O30** | 56.5 | 3.2 | 29.4 | 75 | 10.59 | 159.8 | 6.2 |
| **K50_O31** | 49.5 | 2.7 | 30.6 | 50 | 11.9 | 148.3 | 3.19 |
| **K46_O30** | 45.7 | 2.2 | 29.8 | 35 | 11.71 | 123.7 | 6.9 |
| **K46_O30_O23** | 29.8 | 2.2 | 22.6 | 44 | 12.57 | 12 | 6.9 |
